# Supplementary material for: mTOR controls ChREBP transcriptional activity and pancreatic β cell survival under diabetic stress
Source: PubMed Central journal article supplement — J Cell Biol. 2017 Jul 3;216(7):2091–105. doi: 10.1083/jcb.201701085 (PMC5496625; doi:10.1083/jcb.201701085), 2017-07-03
Supplement: JCB_201701085_sm.pdf [file JCB_201701085_sm.pdf]

Chau et al., <https://doi.org/10.1083/jcb.201701085>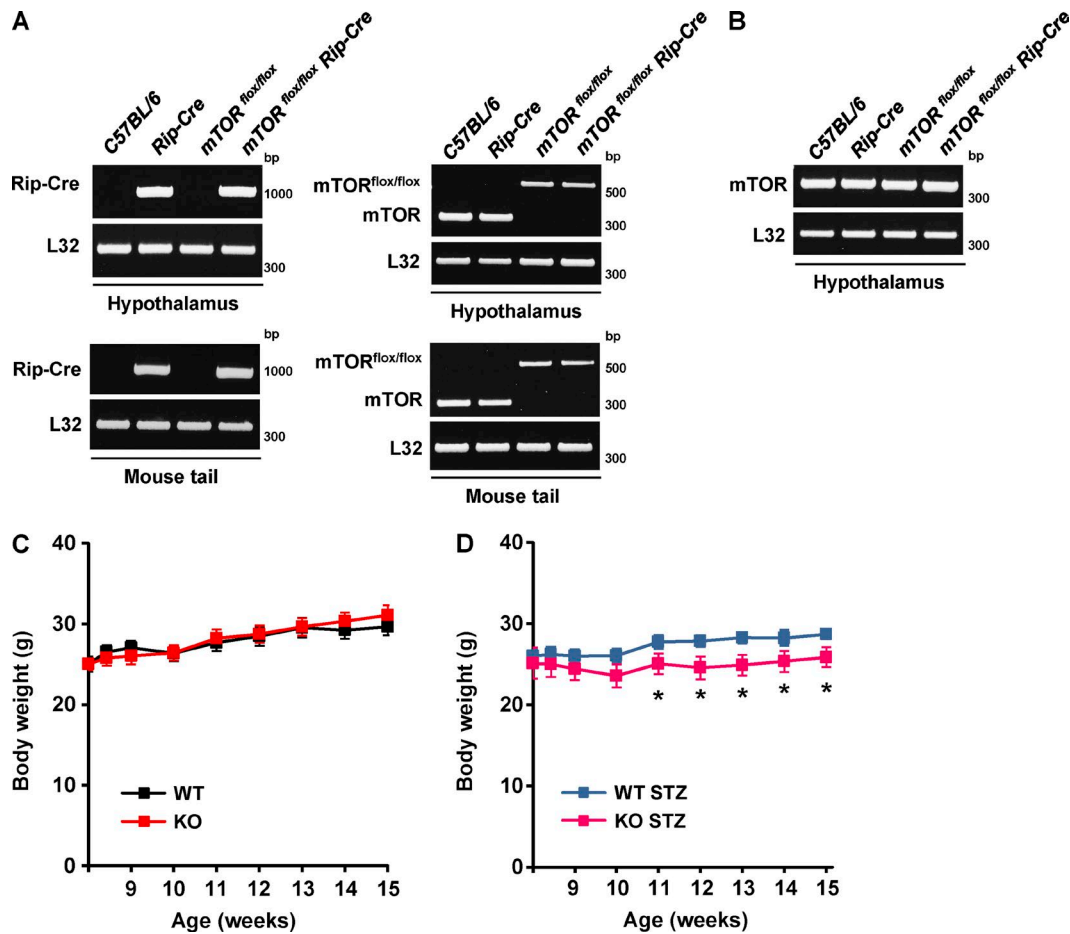

Figure S1. **Genotyping and mouse body weight.** (A) Genotyping for *Rip* transgenic (*Rip-Cre*) and *lox/lox* in hypothalamic DNA and mouse tail DNA. (B) The expression of mTOR in hypothalamic RNA was determined by RT-PCR analysis. (C) Body weights of WT and  $\beta$ mTORKO mice. (D) WT and mTOR-deficient mice were treated twice a week for 2 wk with either vehicle (Veh) or STZ (100 mg/kg body weight). Body weights were monitored weekly for 8 wk after STZ administration. In C and D, WT,  $n = 12$ ; knockout (KO),  $n = 9$ . Values are given as mean  $\pm$  SEM. \*,  $P < 0.05$  versus WT-STZ (ANOVA).

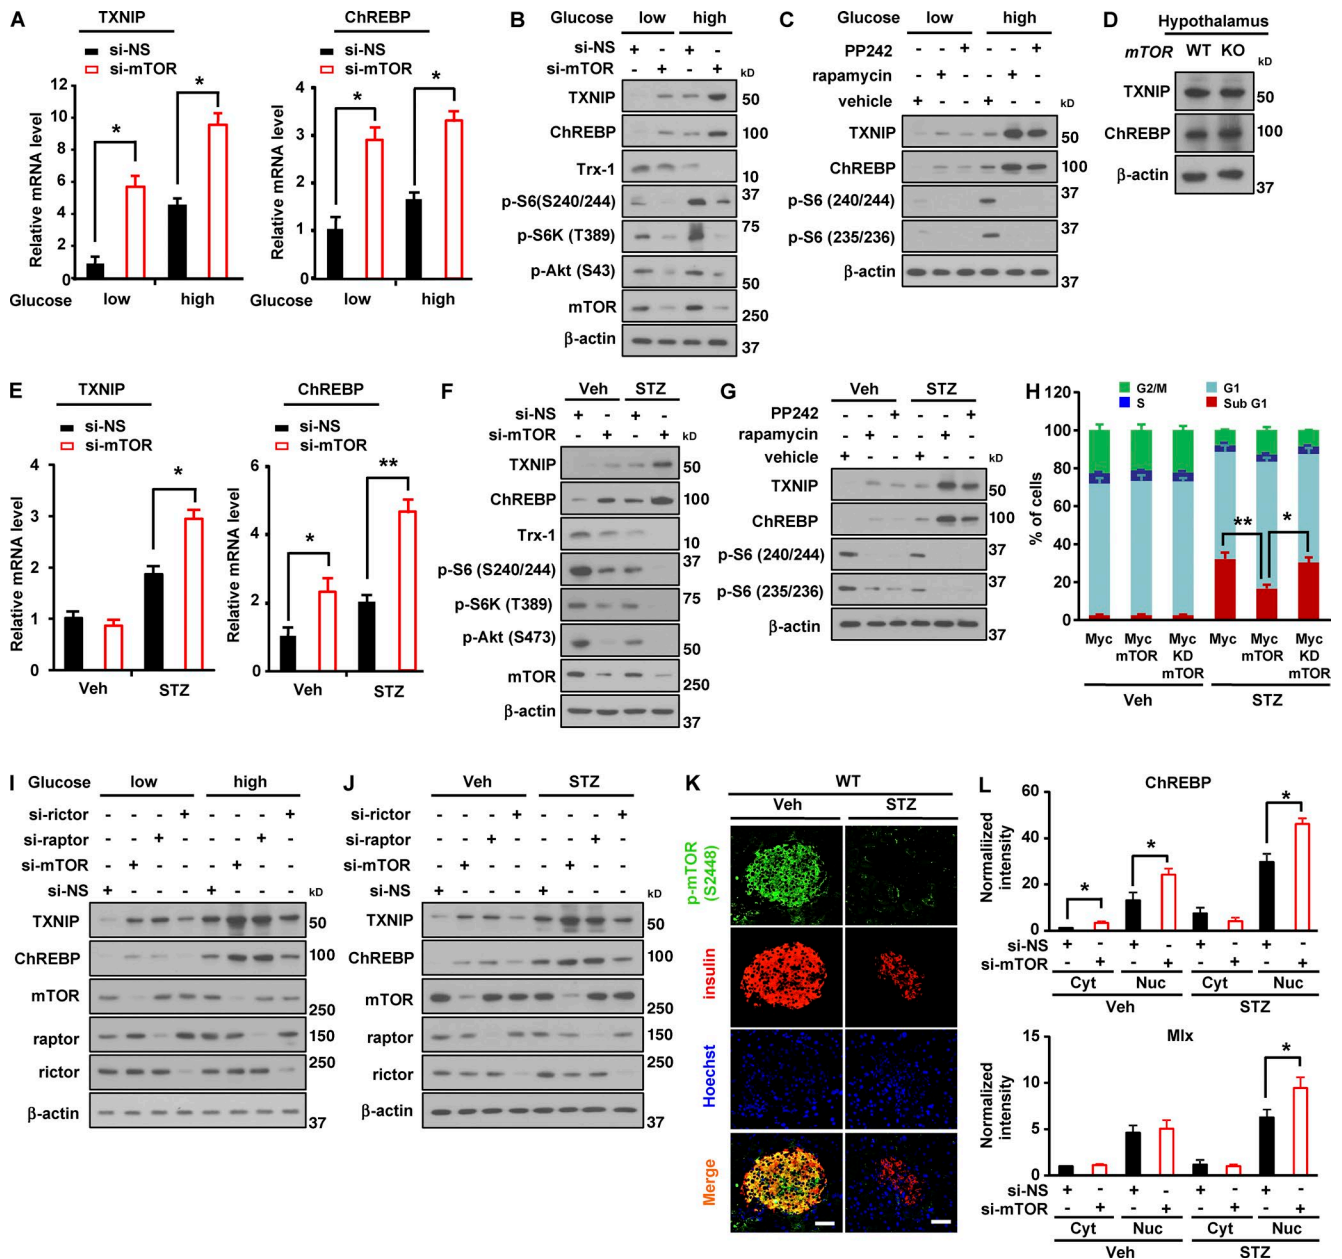

Figure S2. **Depletion of mTOR or Inhibition of mTOR activity results in increase of TXNIP and ChREBP expression.** (A) TXNIP and ChREBP mRNA levels after mTOR knockdown after high-glucose treatment. (B) Immunoblots showing TXNIP and ChREBP expression in INS cells upon high-glucose treatment. (C) Immunoblots showing TXNIP and ChREBP expression in rapamycin- or PP242-treated INS-1 cells in response to high glucose. (D) Analysis of hypothalamus protein extracts by immunoblotting with indicated antibodies (WT,  $n = 5$ ; knockout [KO],  $n = 3$ ). (E) The mRNA levels of TXNIP and ChREBP in mTOR knockdown cells after STZ treatment. (F) Immunoblots showing TXNIP and ChREBP expression in INS-1 cells under STZ treatment. (G) Immunoblots showing expression of TXNIP and ChREBP in STZ-treated INS-1 cells after treatment with 20 nM rapamycin or 1  $\mu$ M PP242. After siRNA transfection, INS-1 cells were treated with 1 mM STZ for 2 h, followed by a 2-h recovery time. (H) FACS data showing the percentage of cells in sub-G1 phase after mTOR over-expression after STZ treatment. (I) Immunoblots showing levels of TXNIP and ChREBP in INS-1 cells after knockdown of raptor or rictor after high-glucose treatment. (J) Immunoblots showing levels of TXNIP and ChREBP in INS-1 cells after knockdown of raptor or rictor after 1 mM STZ treatment for 2 h. (K) Phosphorylation of mTOR Ser 2448 in islets from WT mice after STZ exposure. Bars, 50  $\mu$ m. (L) Densitometric analysis of expression levels of ChREBP or Mlx detected in the cytoplasm (normalized to  $\alpha$ -tubulin) and nucleus (normalized to PARP-1) after mTOR depletion. In A, E H, and L, values are given as mean  $\pm$  SEM of three independent experiments. \*,  $P < 0.05$  versus si-NS (ANOVA); \*\*,  $P < 0.01$  versus Myc (ANOVA). Cyt, cytoplasm; Nuc, nucleus; Veh, vehicle.

Table S1. Information on human islets

| Subject | Sex    | Age       | Body mass index         | Condition   |
|---------|--------|-----------|-------------------------|-------------|
|         |        | <i>yr</i> | <i>kg/m<sup>2</sup></i> |             |
| 1       | Male   | 53        | 22.8                    | Nondiabetes |
| 2       | Female | 38        | 22.1                    | Nondiabetes |
| 3       | Female | 67        | 29.4                    | Nondiabetes |
| 4       | Female | 49        | 23.1                    | Nondiabetes |
| 5       | Female | 61        | 21.3                    | Nondiabetes |
| 6       | Female | 57        | 21.5                    | Nondiabetes |
| 7       | Male   | 62        | 21.1                    | Diabetes    |
| 8       | Male   | 67        | 24.2                    | Diabetes    |
| 9       | Female | 83        | 23.2                    | Diabetes    |
| 10      | Male   | 63        | 21.9                    | Nondiabetes |
| 11      | Male   | 79        | 22.3                    | Diabetes    |
| 12      | Female | 75        | 20.7                    | Diabetes    |
| 13      | Female | 77        | 23.7                    | Diabetes    |
| 14      | Male   | 58        | 17.8                    | Nondiabetes |
| 15      | Male   | 58        | 17.1                    | Nondiabetes |
| 16      | Female | 54        | 19.6                    | Nondiabetes |
| 17      | Male   | 73        | 21.9                    | Diabetes    |
